# Supplementary material for: Low Anaerobic Threshold and Increased Skeletal Muscle Lactate Production in Subjects with Huntington's Disease
Source: PubMed Central journal article supplement (PMC3081141; doi:10.1002/mds.23258), 2010-10-07
Supplement: mds0026-0130-SD1.pdf [file mds0026-0130-SD1.pdf]

| Subjects no. | Genotype | Gender | Age (years) | CAG repeat number | Age at onset | Independance scale score | Functional capacity |
|--------------|----------|--------|-------------|-------------------|--------------|--------------------------|---------------------|
| 1            | HD       | M      | 40          | 55                | 31           | 70                       | 4                   |
| 2            | HD       | M      | 36          | 50                | 35           | 90                       | 11                  |
| 3            | HD       | M      | 55          | 43                | 40           | 70                       | 6                   |
| 4            | HD       | M      | 53          | 47                | 49           | 100                      | 13                  |
| 5            | HD       | M      | 58          | 42                | 50           | 50                       | 2                   |
| 6            | Control  | M      | 36          |                   |              |                          |                     |
| 7            | Control  | M      | 50          |                   |              |                          |                     |
| 8            | Control  | M      | 48          |                   |              |                          |                     |
| 9            | Control  | M      | 27          |                   |              |                          |                     |
| 10           | Control  | M      | 48          |                   |              |                          |                     |

**Supplemental Table 1.** Demographic and genetic data of HD patients and control subjects. Muscle biopsies were used for myoblast culture.
